# Supplementary material for: Solvent-induced self-assembly of hydrogen bonded P4VP-perylenebisimide comb polymer
Source: Royal Society of Chemistry journal article supplement (doi:10.1039/c3tc31015a), 2013-01-01

Supporting information for  
**Manuscript submitted to *Journal of Materials Chemistry C***  
**Manuscript ID TC-ART-05-2013-031015**

**Solvent-Induced Self-assembly of Hydrogen bonded  
P4VP-Perylenebisimide Comb Polymer**

Rekha Narayan and S. K. Asha\*<sup>1</sup>

Polymer & Advanced Material Laboratory,  
Polymer Science & Engineering Division,  
CSIR, NCL, Pune-411008, Maharashtra, India.

Fax: 0091-20-25902615.

---

<sup>1</sup> Corresponding Author: S. K. Asha, E-mail: [sk.asha@ncl.res.in](mailto:sk.asha@ncl.res.in) Fax: 0091-20-25902615.

**Figure-S1:** Expanded aromatic regions in the  $^1\text{H}$  NMR spectra of (a) **P4VP(PDP-UPBI) $_{1,0}$**  and (b) **PDP-UPBI** recorded in  $[\text{D}_2]\text{TCE}$  as a function of temperature.

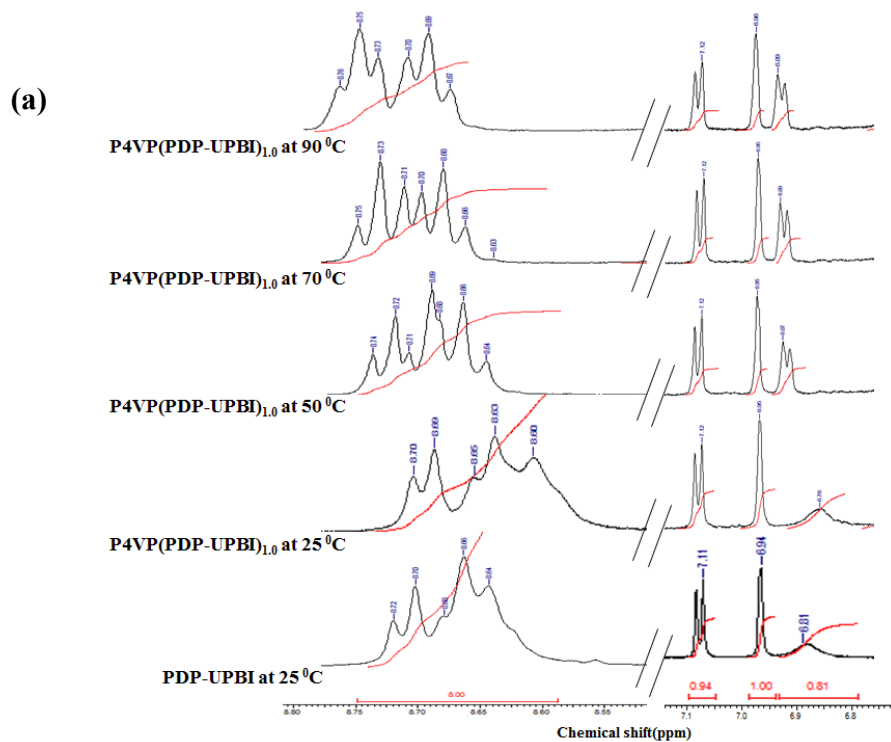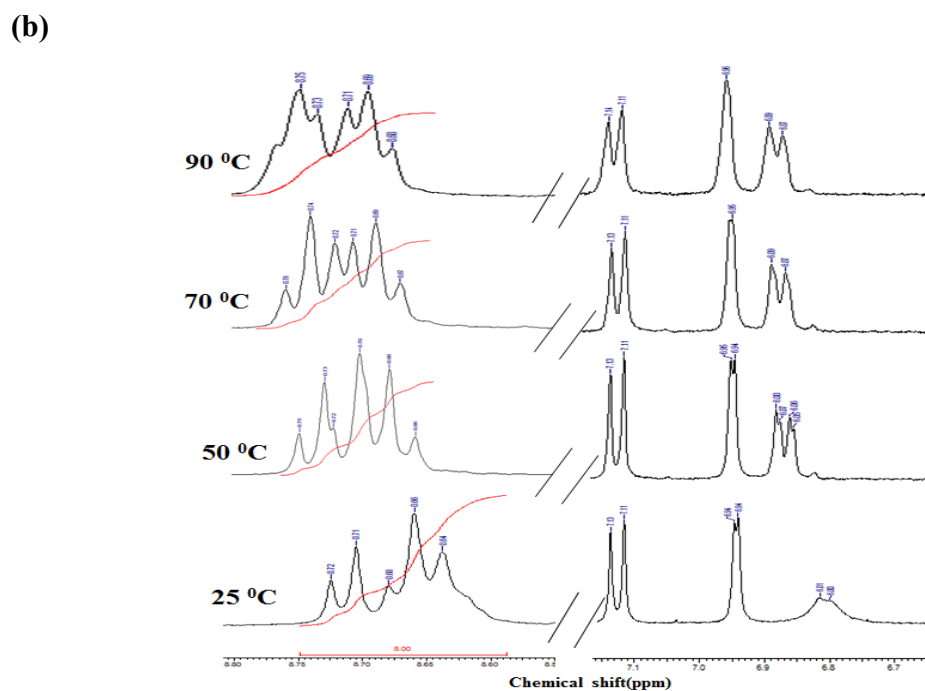

**Figure-S2:** Degree of aggregation ( $\alpha$ ) as a function of temperature for 0.1 OD solutions of **P4VP(PDP-UPBI)<sub>n</sub>** complexes in MCH.

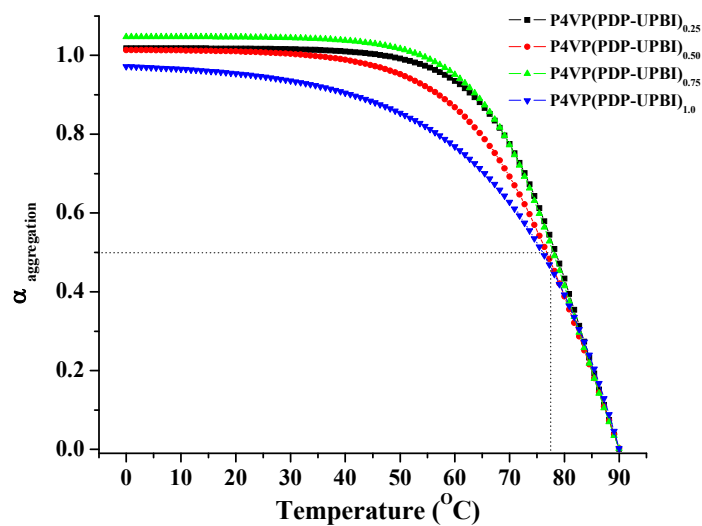

**Figure-S3:** Emission spectra of 0.1 OD solutions of **P4VP(PDP-UPBI)<sub>1.0</sub>** in MCH and  $\text{CHCl}_3$ .

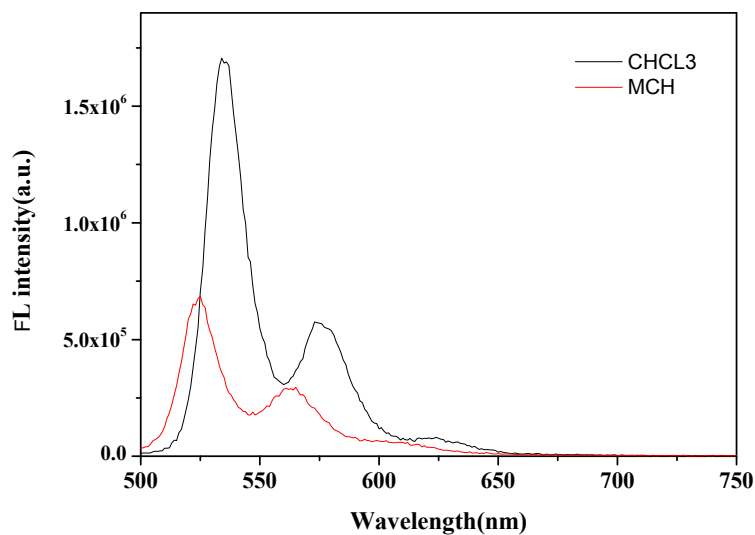

**Figure-S4:** Fluorescence lifetime decay profiles of **P4VP(PDP-UPBI)<sub>1.0</sub>** and **PDP-UPBI** in MCH .

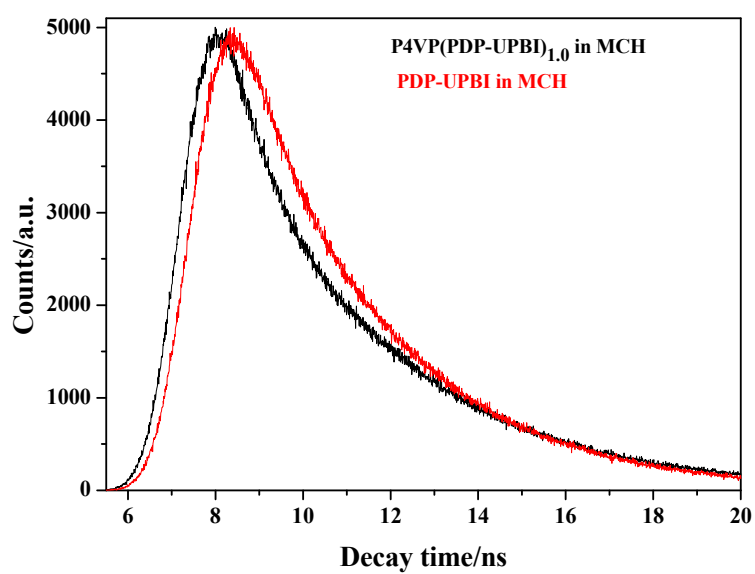

**Figure-S5:** SEM images of **P4VP(PDP-UPBI)<sub>1.0</sub>** drop casted from 5mg/mL solutions in  $\text{CHCl}_3$ .

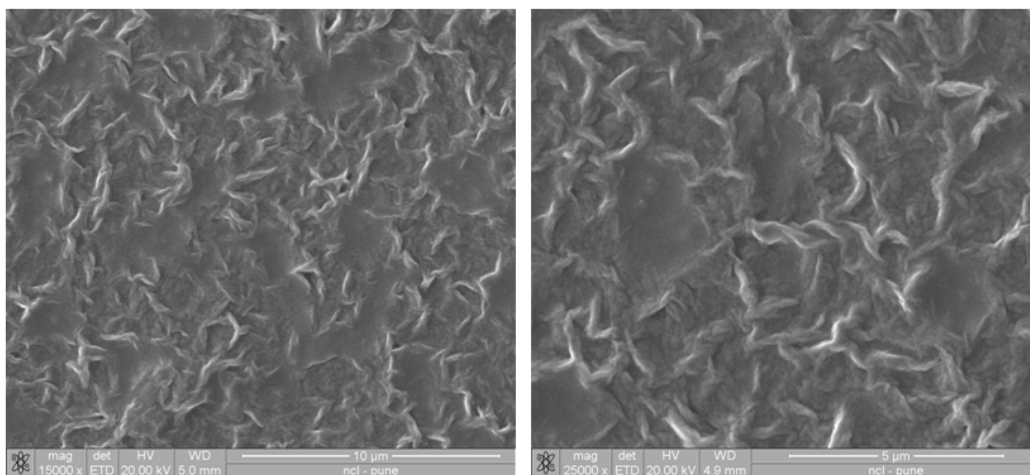

**Figure-S6:** SEM images of **P4VP(PDP-UPBI)<sub>1.0</sub>** drop casted from 5mg/mL solutions in MCH

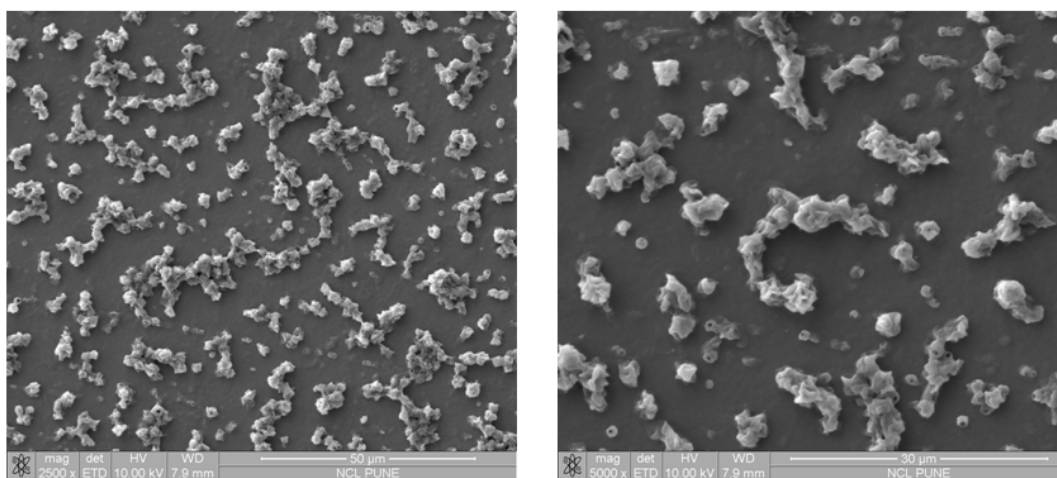

**Figure-S7:** TEM images of  $\text{P4VP(PDP-UPBI)}_{1.0}$  drop casted from 2 mg/mL solutions in  $\text{CHCl}_3$ .

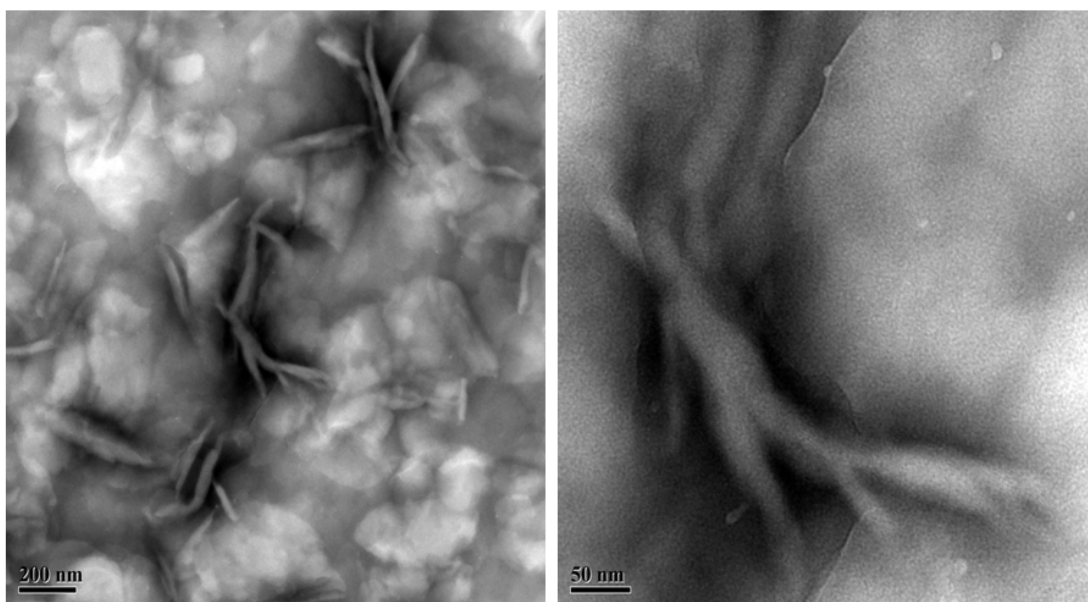

**Figure-S8:** TEM images of  $\text{P4VP(PDP-UPBI)}_{1.0}$  drop casted from 2mg/mL solutions in MCH

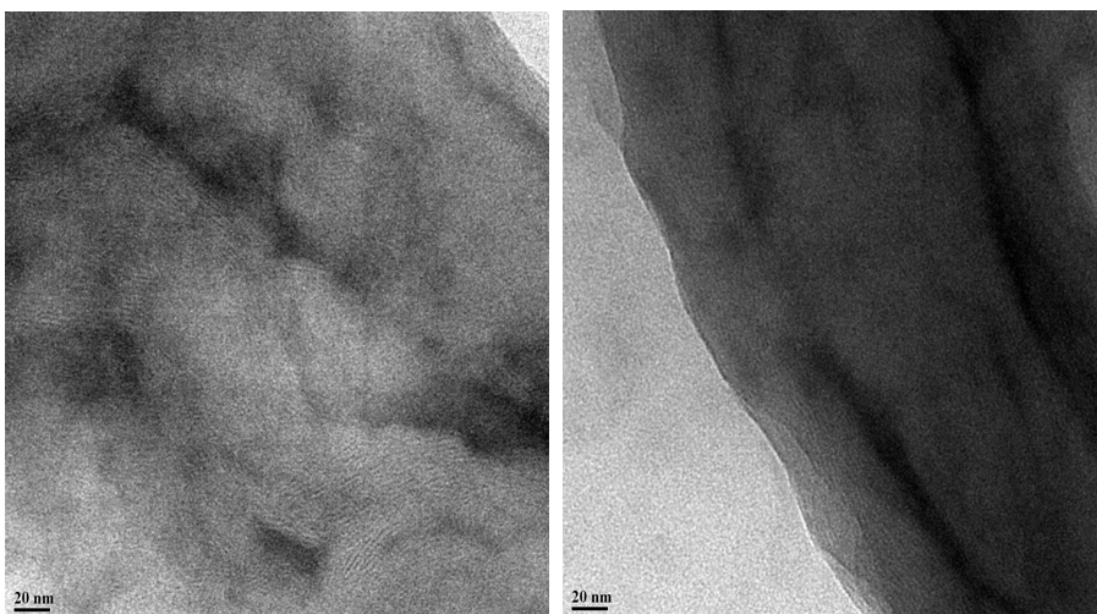

Supplement: c3tc31015a.pdf [file c3tc31015a.pdf]
